# Supplementary material for: β-Hairpin of Islet Amyloid Polypeptide Bound to an Aggregation Inhibitor
Source: PubMed Central journal article supplement (PMC5027568; doi:10.1038/srep33474), 2016-09-19
Supplement: srep33474-s1.pdf [file srep33474-s1.pdf]

## **Supplementary Information**

### **$\beta$ -Hairpin of Islet Amyloid Polypeptide Bound to an Aggregation Inhibitor**

Ewa A. Mirecka, Sophie Feuerstein, Lothar Gremer, Gunnar F. Schröder, Matthias Stoldt,  
Dieter Willbold & Wolfgang Hoyer

#### **Content**

- Supplementary Figure 1: Inhibition of seeded IAPP aggregation by substoichiometric concentrations of HI18.
- Supplementary Table 1: NMR and refinement statistics of the IAPP:HI18 complex

**Supplemental Figure 1: Inhibition of seeded IAPP aggregation by substoichiometric concentrations of HI18.**

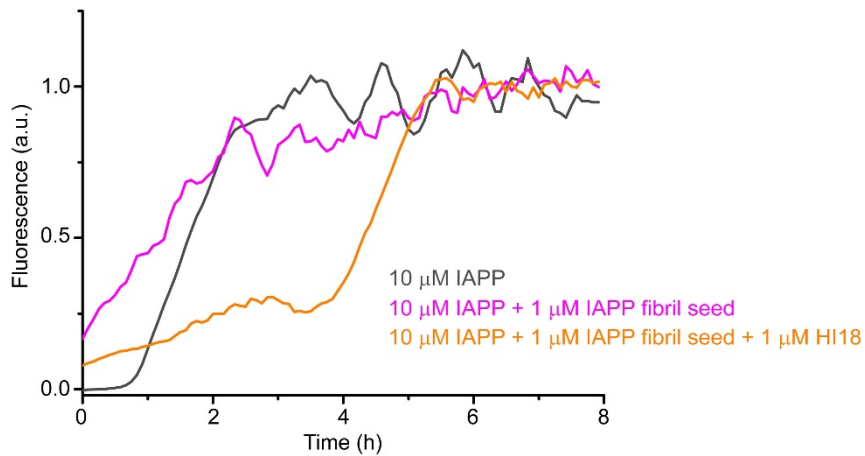

ThT time traces of amyloid formation in 10 μM solutions of monomeric IAPP are shown. In contrast to unseeded amyloid formation (grey time trace), seeded amyloid formation of IAPP (magenta time trace) occurs without a discernable lag-time as the primary nucleation step of amyloid formation is bypassed. However, in the presence of a substoichiometric amount of HI18 (orange time trace), seeded aggregation is strongly retarded, with an increase in the half-time of aggregation by ~3-fold at a HI18:IAPP molar ratio of 1:10.

**Supplementary Table 1: NMR and refinement statistics of the IAPP:HI18 complex**

| NMR distance & dihedral constraints | Number |
|-------------------------------------|--------|
| Distance constraints                |        |
| Unambiguous NOE constraints         | 1235   |
| Intra-residue                       | 554    |
| Inter-residue                       | 681    |
| Sequential ( $ i - j  = 1$ )        | 293    |
| Medium-range ( $ i - j  \leq 5$ )   | 172    |
| Long-range ( $ i - j  > 5$ )        | 104    |
| Intermolecular                      | 112    |
| Ambiguous NOE constraints           | 281    |
| Total dihedral angle restraints     | 186    |

  

| Structure statistics                   | Value               |
|----------------------------------------|---------------------|
| Violations                             |                     |
| Distance constraints (Å)               | $0.025 \pm 0.001$   |
| Dihedral angle constraints (°)         | $0.93 \pm 0.12$     |
| Max. distance constraint violation (Å) | 0.29                |
| Deviations from idealized geometry     |                     |
| Bond lengths (Å)                       | $0.0046 \pm 0.0002$ |
| Bond angles (°)                        | $0.58 \pm 0.02$     |
| Impropers (°)                          | $1.61 \pm 0.06$     |
| Average pairwise r.m.s. deviation* (Å) |                     |
| Heavy                                  | $0.95 \pm 0.07$     |
| Backbone                               | $0.58 \pm 0.07$     |

\*Pairwise r.m.s. deviation was calculated among 10 refined structures
